# Supplementary material
Source: HighWire-hosted journal article supplement (https://jnm.snmjournals.org/highwire/filestream/102264/field_highwire_adjunct_files/0/251546_Supplemental_Data.pdf)
Supplement: 251546_Supplemental_Data.pdf [file 251546_Supplemental_Data.pdf]

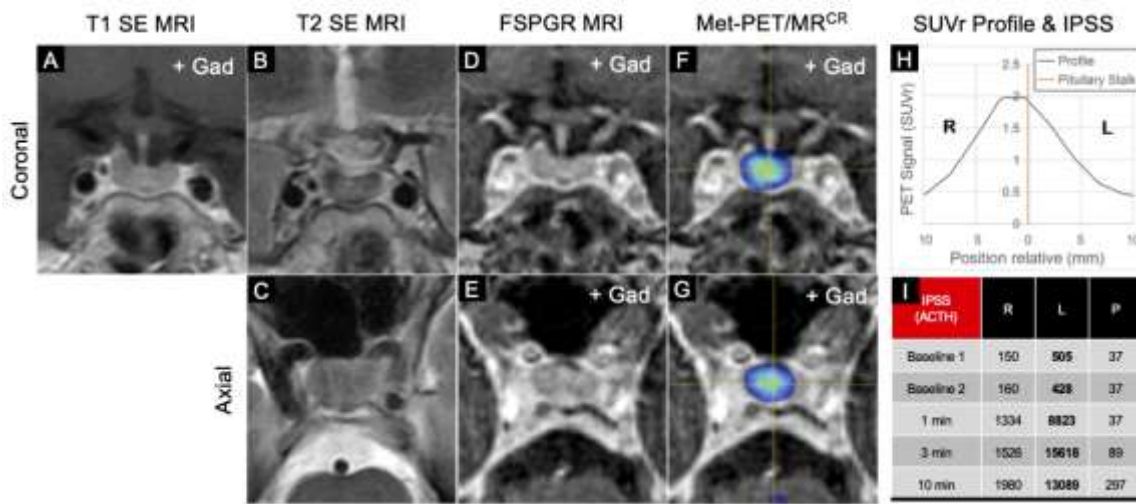

**Supplemental Fig. 1 Profiling of  $^{11}\text{C}$ -methionine sellar uptake in a middle-aged man with Cushing Disease. A-C** Preoperative coronal T1 (A), coronal T2 (B) and axial T2 (C) SE MRI do not reliably identify a pituitary adenoma; note the central position of the infundibulum, with slight gland asymmetry (right>left). **D, E** FSPGR MRI demonstrates similar appearances with no clear lesion visualised. **F-H** Met-PET/MR<sup>CR</sup> shows predominantly central tracer uptake, but with minor asymmetry relative to the infundibulum (right>left), which is confirmed on the SUVr profile (**H**). **I** In contrast, bilateral IPSS, demonstrates a pituitary source, but with apparent left-sided dominance. However, at TSS a small microadenoma was resected from the right side of the gland, with subsequent complete clinical and biochemical remission. **Key:** FSPGR, fast spoiled gradient recalled echo; Gad, gadolinium; IPSS, inferior petrosal sinus sampling; L, left; Met-PET/MR<sup>CR</sup>,  $^{11}\text{C}$ -methionine PET/CT coregistered with FSPGR MRI; P, peripheral; R, right; SE, spin echo; SUVr, Standardised uptake value ratio (relative to cerebellum). TSS, transsphenoidal surgery.

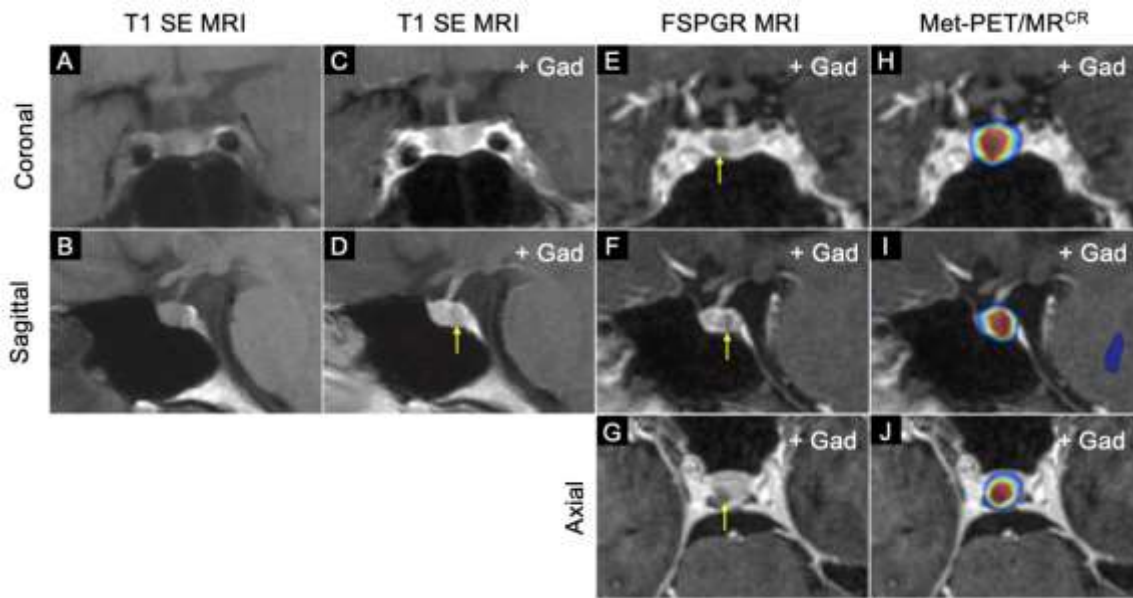

**Supplemental Fig. 2 Confirmation of the site of a microprolactinoma in a young woman with dopamine agonist intolerance.** **A-D** Coronal and sagittal SE MRI pre-and post-gadolinium demonstrates equivocal appearances, with a possible abnormal area posteriorly (yellow arrow) (**D**). **E-G** Coronal, sagittal and axial FSPGR MRI identifies a poorly enhancing lesion posteriorly on the right (yellow arrows). **H-J** Met-PET/MR<sup>CR</sup> shows intense focal tracer uptake at this site, confirming the location of the microprolactinoma. **Key:** *FSPGR, fast spoiled gradient recalled echo; Gad, gadolinium; Met-PET/MR<sup>CR</sup>, <sup>11</sup>C-methionine PET/CT coregistered with FSPGR MRI; SE, spin echo.*

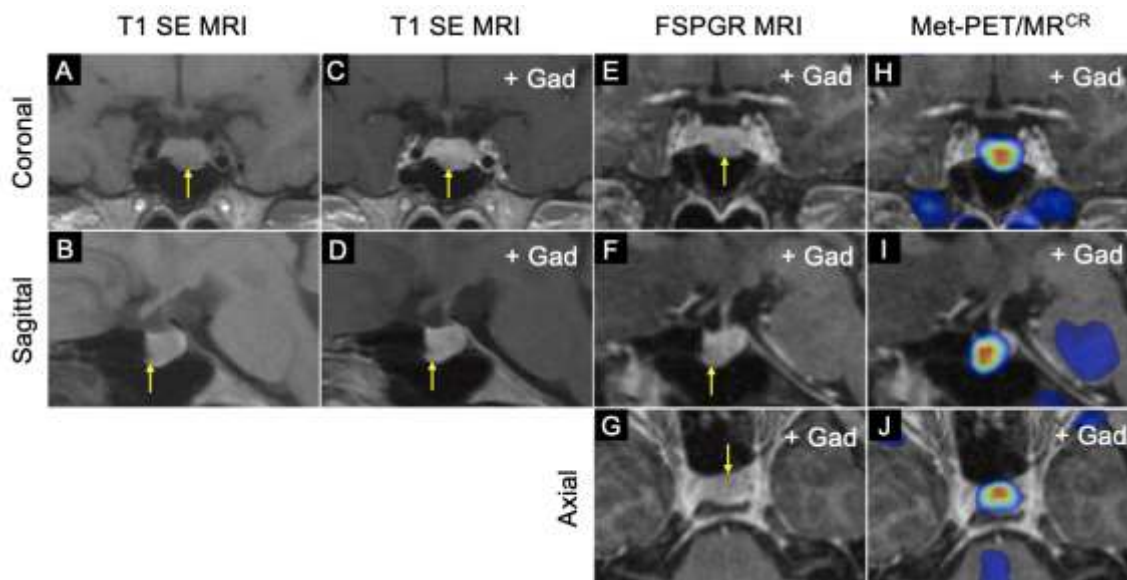

**Supplemental Fig. 3 Confirmation of the site of a thyrotropinoma in a young woman with secondary hyperthyroidism.** **A-D** Coronal and sagittal SE MRI pre-and post-gadolinium demonstrates equivocal appearances, with a possible abnormal area anteriorly/inferiorly (yellow arrows). **E-G** Coronal, sagittal and axial FSPGR MRI also raises the possibility of a poorly enhancing lesion in this area (yellow arrows). **H-J** Met-PET/MR<sup>CR</sup> shows intense focal tracer uptake at this site, confirming the location of the microthyrotropinoma. **Key:** *FSPGR*, fast spoiled gradient recalled echo; *Gad*, gadolinium; *Met-PET/MR<sup>CR</sup>*, <sup>11</sup>C-methionine PET/CT coregistered with FSPGR MRI; *SE*, spin echo.

**Supplemental Table 1: Key findings in studies targeting somatostatin receptor expression for pituitary imaging**

| Ligand                           | Studies*                      | Tumour subtypes (number of subjects)                  | Key findings                                                                                                                                                                                                                                                                                       |                                                                                                                                                                                                        |
|----------------------------------|-------------------------------|-------------------------------------------------------|----------------------------------------------------------------------------------------------------------------------------------------------------------------------------------------------------------------------------------------------------------------------------------------------------|--------------------------------------------------------------------------------------------------------------------------------------------------------------------------------------------------------|
| <sup>123</sup> I-Tyr3-octreotide | Faglia et al, 1991(1)         | GH (3), NFPA (8), PRL (3)                             | 3/3 GH-secreting PA, 2/8 NFPA and 0/3 macroprolactinoma demonstrated tracer uptake                                                                                                                                                                                                                 |                                                                                                                                                                                                        |
|                                  | Ur et al, 1992(2)             | GH (15)                                               | Positive correlation between tracer uptake and biochemical response in 8/15 subjects with acromegaly who also underwent an acute GH suppression test with octreotide                                                                                                                               |                                                                                                                                                                                                        |
| <sup>111</sup> In-pentetreotide  | de Bruin et al, 1992(3)       | NFPA (7)                                              | 6/7 NFPA demonstrated uptake; correlated with tumoral SSTR expression; but no correlation with tumour shrinkage in response to octreotide therapy                                                                                                                                                  |                                                                                                                                                                                                        |
|                                  | Scheidhauer et al, 1993(4)    | Different CNS tumors (45)                             | Tracer uptake demonstrated in 50% of PAs (independent of endocrine status)                                                                                                                                                                                                                         |                                                                                                                                                                                                        |
|                                  | Boni et al, 1995(5)           | GH (13), NFPA (12), TSH (3)                           | Positive scans more commonly observed with GH- (12/13) and TSH- (2/3) secreting pituitary PA, and less frequently in NFPA (2/12)                                                                                                                                                                   |                                                                                                                                                                                                        |
|                                  | Maini et al, 1995(6)          | GH (7), NFPA (8), PRL (5)                             | Variable uptake across CNS tumour subtypes: modest in pituitary adenomas; intense in meningiomas                                                                                                                                                                                                   |                                                                                                                                                                                                        |
|                                  | Tumiati et al, 1995(7)        | na (21)                                               | Uptake predominantly in GH-secreting macroadenomas                                                                                                                                                                                                                                                 |                                                                                                                                                                                                        |
|                                  | Colao et al, 1996(8)          | GH (23)                                               | Positive correlation between degree of tracer uptake and reduction of GH and IGF-1 levels in patients with acromegaly treated with short-acting octreotide                                                                                                                                         |                                                                                                                                                                                                        |
|                                  | Luyken et al, 1996(9)         | na (18)                                               | Tracer uptake observed in 50% of PA (regardless of endocrine secretory state)                                                                                                                                                                                                                      |                                                                                                                                                                                                        |
|                                  | van Royen et al, 1996(10)     | NFPA (2), PRL (1), TSH (2), ACTH (1)                  | Tracer uptake more accurately determined using a fixed ROI (without background correction)                                                                                                                                                                                                         |                                                                                                                                                                                                        |
|                                  | Borson-Chazot et al, 1997(11) | GH (19), NFPA (29)                                    | In patients with acromegaly (n=19), positive SSTR scintigraphy predicted biochemical response to octreotide therapy (but with low negative predictive value); in patients with NFPA (n=29), negative SSTR scintigraphy correlated with an absence of visual improvement during octreotide therapy. |                                                                                                                                                                                                        |
|                                  | Losa et al, 1997(12)          | TSH (5)                                               | Tracer uptake observed in a small cohort of TSH-secreting PA, with a trend for the degree of uptake to correlate with extent of TSH suppression in response to an octreotide test dose                                                                                                             |                                                                                                                                                                                                        |
|                                  | Plockinger et al, 1997(13)    | GH (25), NFPA (24)                                    | Poor correlation between tracer uptake and tumour volume in both GH-secreting PA and NFPA; no correlation with biochemical status; unable to identify postoperative tumour remnants not already visible on MRI                                                                                     |                                                                                                                                                                                                        |
|                                  | Rieger et al, 1997(14)        | GH (11), NFPA (25), PRL (6)                           | Tracer uptake not predictive of biochemical or structural responses to octreotide therapy in different subtypes of PA                                                                                                                                                                              |                                                                                                                                                                                                        |
|                                  | Legovini et al, 1997(15)      | GH (12)                                               | Tracer uptake not predictive of response to octreotide therapy in acromegaly                                                                                                                                                                                                                       |                                                                                                                                                                                                        |
|                                  | Gorges et al, 1997(16)        | GH (22)                                               | Poor ability to discriminate between normal pituitary gland and GH-secreting PA                                                                                                                                                                                                                    |                                                                                                                                                                                                        |
|                                  | Lauriero et al, 1998(17)      | GH (10), NFPA (1), PRL (10)                           | Detection of PA remnants enhanced when MRI is combined with <sup>111</sup> In-pentetreotide SPECT                                                                                                                                                                                                  |                                                                                                                                                                                                        |
|                                  | Oppizzi et al, 1998(18)       | GH (17), NFPA (22)                                    | Variable tracer uptake in GH-secreting and non-functioning PA                                                                                                                                                                                                                                      |                                                                                                                                                                                                        |
|                                  | Schmidt et al, 1998(19)       | GH (8), NFPA (14), PRL (2)                            | Positive scans in 9 of 24 (37.5%) PA (2/8 GH-secreting; 6/14 NFPA; 1/2 prolactinomas)                                                                                                                                                                                                              |                                                                                                                                                                                                        |
|                                  | Duet et al, 1999(20)          | GH (11), NFPA (17), TSH (4)                           | Tracer uptake not predictive of response to octreotide therapy across PA subtypes                                                                                                                                                                                                                  |                                                                                                                                                                                                        |
|                                  | Colao et al, 1999(21)         | GH (24), GH/PRL (4), NFPA (9)                         | Tracer uptake not predictive of response to octreotide therapy in acromegaly, mixed GH/PRL-secreting PA or NFPA                                                                                                                                                                                    |                                                                                                                                                                                                        |
|                                  | Nielsen et al, 2001(22)       | GH (7), NFPA (11), PRL (2), ACTH (1)                  | Tracer uptake not significantly different between GH-secreting and NFPA                                                                                                                                                                                                                            |                                                                                                                                                                                                        |
|                                  | Socin et al, 2003(23)         | TSH (7)                                               | Positive scan in 3 of 7 TSH-secreting PA                                                                                                                                                                                                                                                           |                                                                                                                                                                                                        |
|                                  | Acosta-Gomez et al, 2005(24)  | GH (7), NFPA (10), PRL (6), ACTH (8), FSH (2), LH (1) | Able to differentiate scar tissue from recurrent PA post-operatively (sensitivity = 79%) when combined with MRI                                                                                                                                                                                    |                                                                                                                                                                                                        |
|                                  | de Herder et al, 2005(25)     | GH (10)                                               | No correlation between tracer uptake and GH response to octreotide in 10 patients with acromegaly                                                                                                                                                                                                  |                                                                                                                                                                                                        |
|                                  | <sup>99m</sup> Tc P829        | Chiewvit et al, 1999(26)                              | na (11)                                                                                                                                                                                                                                                                                            | Tracer uptake demonstrated in 3 of 8 PA                                                                                                                                                                |
|                                  | <sup>99m</sup> Tc-HYNIC-TOC   | Vukomanovic et al, 2019(27)                           | GH (3), NFPA (20), PRL (8), ACTH (2)                                                                                                                                                                                                                                                               | Sella uptake demonstrated in 30 of 33 patients (3 negative NFPA in a population of 8 macroadenomas and 25 microadenomas); however, tracer uptake also observed in 8 of 37 control subjects without PA. |
|                                  | <sup>68</sup> Ga DOTATATE     | Zhao et al, 2014(28)                                  | GH (14), GH/PRL (1), NFPA (10), ACTH (9)                                                                                                                                                                                                                                                           | Higher <sup>68</sup> Ga-DOTATATE uptake observed in normal pituitary tissue; <sup>18</sup> F-FDG uptake greater in recurrent/remnant PA                                                                |
| Wang et al, 2018(29)             |                               | GH (3), TSH (1), ACTH (33)                            | Combination of <sup>18</sup> F-FDG PET and <sup>68</sup> Ga-DOTATATE PET aids differentiation of microadenomas from normal pituitary tissue                                                                                                                                                        |                                                                                                                                                                                                        |
| <sup>68</sup> Ga DOTATOC         | Tjornstrand et al, 2019(30)   | NFPA (9)                                              | Lower tracer uptake in clinically non-functioning PA (7 SF-1 and 2 T-Pit staining tumours) when compared with normal pituitary gland.                                                                                                                                                              |                                                                                                                                                                                                        |

**Key:** CNS, central nervous system; DOTATATE, DOTA-Tyr3-octreotate; DOTATOC, DOTA-Tyr3-octreotide; FDG, fluorodeoxyglucose; Ga, gallium; GH, growth hormone; HYNIC-TOC, hydrazinonicotinyl-Tyr3-octreotide; MRI, magnetic resonance imaging; na, not available; NFPA, non-functioning pituitary adenoma; P829, peptide 829 (a low molecular weight SSTR ligand); PA, pituitary adenoma; PET, positron emission tomography; ROI, region of interest; SF-1, steroidogenic factor 1; SPECT, single photon emission computed tomography; SSTR, somatostatin receptor(s); T-Pit, corticotroph lineage transcription factor; Tc, technetium; TSH, thyroid stimulating hormone (thyrotropin).

\*Only studies reporting  $\geq 5$  subjects are shown

**Supplemental Table 2:** Key findings in studies targeting dopamine receptor expression for pituitary imaging

| Ligand                            | Studies*                  | Tumour subtypes (number of subjects)                    | Key findings                                                                                                                                                                                                                          |
|-----------------------------------|---------------------------|---------------------------------------------------------|---------------------------------------------------------------------------------------------------------------------------------------------------------------------------------------------------------------------------------------|
| <sup>11</sup> C-N-methylspiperone | Muhr et al, 1986(31)      | na (26)                                                 | Good correlation between degree of tracer uptake and biochemical and radiological responses to bromocriptine in prolactinomas; in contrast, minimal tracer uptake in NFPAs in keeping with limited response to bromocriptine therapy. |
| <sup>11</sup> C-raclopride        | Muhr et al, 1986(31)      | na (26)                                                 |                                                                                                                                                                                                                                       |
|                                   | Muhr et al, 2006(32)      | na (165)                                                | Tracer uptake in prolactinomas and D2R-expressing GH-secreting tumours predicted response to dopamine agonist therapy                                                                                                                 |
| <sup>18</sup> F-FESP              | Lucignani et al, 1997(33) | NFPA (8)                                                | Tracer uptake 2-3-fold higher in NFPAs compared with meningioma and craniopharyngioma.                                                                                                                                                |
| <sup>123</sup> I-iodobenzamide    | Pirker et al, 1994(34)    | GH (2), NFPA (4), PRL (8), ACTH (1)                     | Low sensitivity for visualisation of prolactinomas and GH-secreting PA                                                                                                                                                                |
|                                   | de Herder et al, 1996(35) | GH (12), NFPA (17), MacroPRL (5), MicroPRL (2), TSH (1) | Variable positivity in macroprolactinomas; negative scans in microprolactinomas (n=2), TSH-secreting PA (n=1) and GH-secreting PA (n=12)                                                                                              |
|                                   | Ferone et al, 1998(36)    | GH (4), NFPA (6), PRL (4)                               | Positive correlation between SPECT uptake and biochemical and structural responses to quinagolide and cabergoline in prolactinomas and NFPAs                                                                                          |
|                                   | Colao et al, 2000(37)     | NFPA (10), PRL (10)                                     |                                                                                                                                                                                                                                       |
| <sup>123</sup> I-epidepride       | Pirker et al, 1996(38)    | GH (4), NFPA (4), PRL (9), ACTH (2)                     | Tracer uptake (using SPECT) demonstrated in prolactinoma (8/9), NFPA (4/4) and GH-secreting PA (2/4); no uptake shown in ACTH-secreting PA (2/2)                                                                                      |
|                                   | de Herder et al, 1999(39) | NFPA (15), PRL (4)                                      | SPECT uptake using <sup>123</sup> I-epidepride superior to <sup>123</sup> I-iodobenzamide in dopamine receptor-positive adenomas; uptake seen in 60% of NFPA cases (9/15).                                                            |
|                                   | de Herder et al, 2006(40) | na (85)                                                 | Limited clinical utility in predicting clinical efficacy of DA therapy in selected patients with NFPAs                                                                                                                                |

**Key:** ACTH, adrenocorticotrophic hormone; D2R, dopamine receptor subtype 2; FESP, fluoroethylspiperone; GH, growth hormone; NFPA, non-functioning pituitary adenoma. SRS, somatostatin receptor scintigraphy; MRI, magnetic resonance imaging; na, not available; PA, pituitary adenoma; PET, positron emission tomography; SPECT, single photon emission computed tomography.

\*Only studies reporting ≥5 subjects are shown

**Supplemental Table 3: Key findings in studies using <sup>18</sup>F-FDG for the detection of pituitary adenomas**

| Ligand              | Studies*                    | Tumour subtypes (number of subjects)          | Key findings                                                                                                                                                                                                                                                                                                                                                                                                                                                                                                                                                                        |
|---------------------|-----------------------------|-----------------------------------------------|-------------------------------------------------------------------------------------------------------------------------------------------------------------------------------------------------------------------------------------------------------------------------------------------------------------------------------------------------------------------------------------------------------------------------------------------------------------------------------------------------------------------------------------------------------------------------------------|
| <sup>18</sup> F-FDG | Francavilla et al, 1991(41) | na (24)                                       | Highest tracer uptake in NFPA compared with other PAs (with TSH-secreting PA exhibiting lowest uptake); findings in recurrent macroadenomas comparable to non-operated cases; lower tracer uptake observed in previously irradiated PA                                                                                                                                                                                                                                                                                                                                              |
|                     | Alzahrani et al, 2009(42)   | ACTH (12)                                     | Tracer uptake in 7 of 12 ACTH-secreting PA (7 <i>de novo</i> and 5 postsurgical cases); in 4 patients with 'negative' MRI scans, <sup>18</sup> F-FDG PET positive in one case; in 5 patients with 'negative' PET scans, MRI positive in 2 subjects                                                                                                                                                                                                                                                                                                                                  |
|                     | Ikeda et al, 2010(43)       | ACTH (12)                                     | <sup>18</sup> F-FDG PET less sensitive (8/12) than <sup>11</sup> C-methionine PET (11/11) for the detection of ACTH-secreting PA                                                                                                                                                                                                                                                                                                                                                                                                                                                    |
|                     | Seok et al, 2013(44)        | GH (5), NFPA (14), PRL (2), ACTH (2), TSH (1) | Tracer uptake observed in all 14 macroadenomas (8 NFPA, 3 GH-secreting, 1 Prolactin-secreting, 1 ACTH-secreting, 1 TSH-secreting) and 5 of 10 microadenomas (3/6 NFPA, 1/2 GH-secreting, 1/1 Prolactin-secreting, 0/1 ACTH-secreting); positive scan in only 1 of 7 Rathke's cleft cysts                                                                                                                                                                                                                                                                                            |
|                     | Zhao et al, 2014(28)        | GH (14), GH/PRL (1), NFPA (10), ACTH (9)      | <sup>18</sup> F-FDG PET, in combination with <sup>68</sup> Ga DOTATATE PET, permitted improved distinction between residual/recurrent PA and normal pituitary gland                                                                                                                                                                                                                                                                                                                                                                                                                 |
|                     | Chittiboina et al, 2015(45) | ACTH (10)                                     | <sup>18</sup> F-FDG PET more sensitive than SE MRI, but less sensitive than FSPGR MRI, for detection of microadenomas in <i>de novo</i> Cushing Disease                                                                                                                                                                                                                                                                                                                                                                                                                             |
|                     | Feng et al, 2016(46)        | GH (16), PRL (12), ACTH (15)                  | Comparison of <sup>18</sup> F-FDG PET (n=43) and <sup>11</sup> C-methionine PET (n=39) in surgically-confirmed PA (16 acromegaly, 15 Cushing's Disease, 12 prolactinomas); <sup>18</sup> F-FDG PET positive in 29 of 43 patients; <sup>11</sup> C-methionine PET positive in 37 of 39 cases (2 false positive scans); 12 patients positive on <sup>11</sup> C-methionine PET but with negative <sup>18</sup> F-FDG PET; in 9 patients with a recurrent microadenoma, <sup>11</sup> C-methionine PET positive in all instances, but <sup>18</sup> F-FDG PET positive in only 2 cases |
|                     | Tosaka et al, 2017(47)      | GH (8), NFPA (14)                             | Higher tracer uptake in NFPA (n=14) than GH-secreting PA (n= 8).                                                                                                                                                                                                                                                                                                                                                                                                                                                                                                                    |
|                     | Wang et al, 2018(48)        | GH (3), ACTH (33), TSH (1)                    | Combination of <sup>18</sup> F-FDG PET and <sup>68</sup> Ga-DOTATATE PET aids differentiation of microadenomas from normal pituitary tissue                                                                                                                                                                                                                                                                                                                                                                                                                                         |
|                     | Boyle et al, 2019(49)       | ACTH (27)                                     | Ability of <sup>18</sup> F-FDG PET to detect ACTH-secreting PA enhanced by CRH stimulation                                                                                                                                                                                                                                                                                                                                                                                                                                                                                          |

**Key:** ACTH, adrenocorticotrophic hormone; CD, Cushing Disease; CRH, corticotropin releasing hormone; DOTATATE, DOTA-Tyr3-octreotate; FDG, fluorodeoxyglucose; Ga, gallium; GH, growth hormone; MRI, magnetic resonance imaging; na, not available; PA, pituitary adenoma; PET, positron emission tomography; NFPA, non-functioning pituitary adenoma; SE, spin echo; SPGR, spoiled gradient recalled.

## REFERENCES

1. Faglia G, Bazzoni N, Spada A, et al. In vivo detection of somatostatin receptors in patients with functionless pituitary adenomas by means of a radioiodinated analog of somatostatin ([<sup>123</sup>I]SDZ 204-090). *J Clin Endocrinol Metab.* 1991;73:850-6.
2. Ur E, Mather SJ, Bomanji J, et al. Pituitary imaging using a labelled somatostatin analogue in acromegaly. *Clin Endocrinol (Oxf).* 1992;36:147-150.
3. de Bruin TW, Kwekkeboom DJ, Van't Verlaat JW, et al. Clinically nonfunctioning pituitary adenoma and octreotide response to long term high dose treatment, and studies in vitro. *J Clin Endocrinol Metab.* 1992;75:1310-1317.
4. Scheidhauer K, Hildebrandt G, Luyken C, Schomäcker K, Klug N, Schicha H. Somatostatin receptor scintigraphy in brain tumors and pituitary tumors: first experiences. *Horm Metab Res Suppl.* 1993;27:59-62.
5. Boni G1, Ferdeghini M, Bellina CR, Matteucci F, Castro Lopez E, Parenti G, Canapicchi R BR. [<sup>111</sup>In-DTPA-D-Phe]-octreotide scintigraphy in functioning and non-functioning pituitary adenomas. - PubMed - NCBI. 1995.
6. Maini CL, Sciuto R, Tofani A, et al. Somatostatin receptor imaging in CNS tumours using <sup>111</sup>In-octreotide. *Nucl Med Commun.* 1995;16:756-766.
7. Tumiaty MN, Facchi E, Gatti C, Bossi A, Longari V. Scintigraphic assessment of pituitary adenomas and several diseases by indium-111-pentetreotide. *Q J Nucl Med.* 1995;39:98-100.
8. Colao A, Ferone D, Lastoria S, et al. Prediction of efficacy of octreotide therapy in patients with acromegaly. *J Clin Endocrinol Metab.* 1996;81:2356-2362.
9. Luyken C, Hildebrandt G, Krisch B, Scheidhauer K, Klug N. Clinical Relevance of Somatostatin Receptor Scintigraphy in Patients with Skull Base Tumours. In: *Modern Neurosurgery of Meningiomas and Pituitary Adenomas.* Vol 1996. Vienna: Springer Vienna; 1996:102-104.
10. van Royen EA, Verhoeff NP, Meylaerts SA, Miedema AR. Indium-111-DTPA-octreotide uptake measured in normal and abnormal pituitary glands. *J Nucl Med.* 1996;37:1449-1451.



11. Borson-Chazot F, Houzard C, Ajzenberg C, et al. Somatostatin receptor imaging in somatotroph and non-functioning pituitary adenomas: correlation with hormonal and visual responses to octreotide. *Clin Endocrinol (Oxf)*. 1997;47:589-598.
12. Losa M, Magnani P, Mortini P, et al. Indium-111 pentetreotide single-photon emission tomography in patients with TSH-secreting pituitary adenomas: Correlation with the effect of a single administration of octreotide on serum TSH levels. *Eur J Nucl Med*. 1997;24:728-731.
13. Plöckinger U, Bäder M, Hopfenmüller W, Saeger W, Quabbe HJ. Results of somatostatin receptor scintigraphy do not predict pituitary tumor volume- and hormone-response to octreotide therapy and do not correlate with tumor histology. *Eur J Endocrinol*. 1997;136:369-376.
14. Rieger A, Rainov NG, Elfrich C, et al. Somatostatin receptor scintigraphy in patients with pituitary adenoma. *Neurosurg Rev*. 1997;20:7-12.
15. Legovini P, De Menis E, Billeci D, Conti B, Zoli P, Conte N. 111Indium-pentetreotide pituitary scintigraphy and hormonal responses to octreotide in acromegalic patients. *J Endocrinol Invest*. 20:424-428.
16. Görges R, Cordes U, Engelbach M, et al. [Prediction of pharmacological effect of octreotide in acromegaly by means of 111In-pentetreotide scintigraphy and calculation of a pituitary uptake index]. *Nuklearmedizin*. 1997;36:117-124.
17. Lauriero F, Pierangeli E, Rubini G, Resta M, D'Addabbo A. Pituitary adenomas: the role of 111In-DTPA-octreotide SPET in the detection of minimal post-surgical residues. *Nucl Med Commun*. 1998;19:1127-1134.
18. Oppizzi G, Cozzi R, Dallabonzana D, et al. Scintigraphic imaging of pituitary adenomas: an in vivo evaluation of somatostatin receptors. *J Endocrinol Invest*. 1998;21:512-519.
19. Schmidt M, Scheidhauer K, Luyken C, et al. Somatostatin receptor imaging in intracranial tumours. *Eur J Nucl Med*. 1998;25:675-686.
20. Duet M, Ajzenberg C, Benelhadj S, et al. Somatostatin receptor scintigraphy in pituitary adenomas: a somatostatin receptor density index can predict hormonal and tumoral efficacy of octreotide in vivo. *J*

*Nucl Med.* 1999;40:1252-1256.

21. Colao A, Lastoria S, Ferone D, et al. The pituitary uptake of (111)In-DTPA-D-Phe1-octreotide in the normal pituitary and in pituitary adenomas. *J Endocrinol Invest.* 1999;22:176-183.
22. Nielsen S, Mellekjær S, Rasmussen LM, et al. Expression of somatostatin receptors on human pituitary adenomas in vivo and ex vivo. *J Endocrinol Invest.* 2001;24:430-437.
23. Socin H, Chanson P, Delemer B, et al. The changing spectrum of TSH-secreting pituitary adenomas: diagnosis and management in 43 patients. *Eur J Endocrinol.* 2003;148:433-442.
24. Acosta-Gómez MJ, Muros MA, Llamas-Elvira JM, et al. The role of somatostatin receptor scintigraphy in patients with pituitary adenoma or post-surgical recurrent tumours. *Br J Radiol.* 2005;78:110-115.
25. de Herder WW, Lamberts SWJ. Somatostatin analogs as radiodiagnostic tools. *Rev Endocr Metab Disord.* 2005;6:23-7.
26. Chiewvit S, Chiewvit P, Pusuwan P, Sriussadaporn S, Ratanamart V. Somatostatin receptor tumor imaging (Tc 99m P829) in pituitary adenoma. *J Med Assoc Thai.* 1999;82:1208-13.
27. Vukomanovic VR, Matovic M, Doknic M, et al. Clinical usefulness of 99mTc-HYNIC-TOC, 99mTc(V)-DMSA, and 99mTc-MIBI SPECT in the evaluation of pituitary adenomas. *Nucl Med Commun.* 2019;40:41-51.
28. Zhao X, Xiao J, Xing B, Wang R, Zhu Z, Li F. Comparison of (68)Ga DOTATATE to 18F-FDG uptake is useful in the differentiation of residual or recurrent pituitary adenoma from the remaining pituitary tissue after transsphenoidal adenectomy. *Clin Nucl Med.* 2014;39:605-8.
29. Wang H, Hou B, Lu L, et al. PET/MRI in the Diagnosis of Hormone-Producing Pituitary Microadenoma: A Prospective Pilot Study. *J Nucl Med.* 2018;59:523-528.
30. Tjörnstrand A, Casar-Borota O, Heurling K, et al. Lower 68 Ga-DOTATOC uptake in nonfunctioning pituitary neuroendocrine tumours compared to normal pituitary gland-A proof-of-concept study. *Clin Endocrinol (Oxf).* December 2019.
31. Muhr C, Bergström M, Lundberg PO, et al. Dopamine receptors in pituitary adenomas: PET

- visualization with 11C-N-methylspiperone. *J Comput Assist Tomogr.* 1986;10:175-80.
32. Muhr C. Positron Emission Tomography in Acromegaly and Other Pituitary Adenoma Patients. *Neuroendocrinology.* 2006;83:205-210.
33. Lucignani G, Losa M, Moresco RM, et al. Differentiation of clinically non-functioning pituitary adenomas from meningiomas and craniopharyngiomas by positron emission tomography with [18F]fluoro-ethyl-spiperone. *Eur J Nucl Med.* 1997;24:1149-1155.
34. Pirker W, Brücke T, Riedl M, et al. Iodine-123-IBZM-SPECT: studies in 15 patients with pituitary tumors. *J Neural Transm Sect JNT.* 1994;97:235-244.
35. de Herder WW, Reijs AE, Kwekkeboom DJ, et al. In vivo imaging of pituitary tumours using a radiolabelled dopamine D2 receptor radioligand. *Clin Endocrinol (Oxf).* 1996;45:755-67.
36. Ferone D, Lastoria S, Colao A, et al. Correlation of Scintigraphic Results Using <sup>123</sup>I-Methoxybenzamide with Hormone Levels and Tumor Size Response to Quinagolide in Patients with Pituitary Adenomas. *J Clin Endocrinol Metab.* 1998;83:248-252.
37. Colao A, Ferone D, Lastoria S, et al. Hormone levels and tumour size response to quinagolide and cabergoline in patients with prolactin-secreting and clinically non-functioning pituitary adenomas: predictive value of pituitary scintigraphy with 123I-methoxybenzamide. *Clin Endocrinol (Oxf).* 2000;52:437-445.
38. Pirker W, Riedl M, Luger A, et al. Dopamine D2 receptor imaging in pituitary adenomas using iodine-123-epidepride and SPECT. *J Nucl Med.* 1996;37:1931-7.
39. de Herder WW, Reijs AE, de Swart J, et al. Comparison of iodine-123 epidepride and iodine-123 IBZM for dopamine D2 receptor imaging in clinically non-functioning pituitary macroadenomas and macroprolactinomas. *Eur J Nucl Med.* 1999;26:46-50.
40. de Herder WW, Reijs AEM, Feelders RA, et al. Dopamine agonist therapy of clinically non-functioning pituitary macroadenomas. Is there a role for 123I-epidepride dopamine D2 receptor imaging? *Eur J Endocrinol.* 2006;155:717-723.
41. Francavilla TL, Miletich RS, DeMichele D, et al. Positron emission tomography of pituitary

macroadenomas. *Neurosurgery*. 1991;28:826.

42. Alzahrani AS, Farhat R, Al-Arifi A, Al-Kahtani N, Kanaan I, Abouziied M. The diagnostic value of fused positron emission tomography/computed tomography in the localization of adrenocorticotropin-secreting pituitary adenoma in Cushing's disease. *Pituitary*. 2009;12:309-314.
43. Ikeda H, Abe T, Watanabe K. Usefulness of composite methionine-positron emission tomography/3.0-tesla magnetic resonance imaging to detect the localization and extent of early-stage Cushing adenoma. *J Neurosurg*. 2010;112:750-755.
44. Seok H, Lee EJY, Choe EY, et al. Analysis of 18F-fluorodeoxyglucose positron emission tomography findings in patients with pituitary lesions. *Korean J Intern Med*. 2013;28:81-88.
45. Chittiboina P, Montgomery BK, Millo C, Herscovitch P, Lonser RR. High-resolution 18F-fluorodeoxyglucose positron emission tomography and magnetic resonance imaging for pituitary adenoma detection in {Cushing} disease. *J Neurosurg*. 2015;122:791-797.
46. Feng Z, He D, Mao Z, et al. Utility of 11C-Methionine and 18F-FDG PET/CT in Patients With Functioning Pituitary Adenomas. *Clin Nucl Med*. 2016;41:e130-e134.
47. Tosaka M, Higuchi T, Horiguchi K, et al. Preoperative Evaluation of Sellar and Parasellar Macrolesions by [ 18 F]Fluorodeoxyglucose Positron Emission Tomography. *World Neurosurg*. 2017;103:591-599.
48. Wang H, Hou B, Lu L, et al. PET/MRI in the Diagnosis of Hormone-Producing Pituitary Microadenoma: A Prospective Pilot Study. *J Nucl Med*. 2018;59:523-528.
49. Boyle J, Patronas NJ, Smirniotopoulos J, et al. CRH stimulation improves 18F-FDG-PET detection of pituitary adenomas in Cushing's disease. *Endocrine*. 2019;65:155-165.
